# Supplementary material for: Development of a novel non-invasive biomarker panel for hepatic fibrosis in MASLD
Source: PubMed Central journal article supplement (PMC11137090; doi:10.1038/s41467-024-48956-0), 2024-05-29
Supplement: 41467_2024_48956_MOESM3_ESM.pdf [file 41467_2024_48956_MOESM3_ESM.pdf]

## **Description of Additional Supplementary Files**

**Supplementary Data 1:** List of differentially expressed genes and their correlation the fractional synthesis rate of at least one of the selected fibrillar collagens. A two-sided Student's t-test was used to test the statistical significance.

**Supplementary Data 2:** Overview of the Fibrosis stages in patients that were included in the translation cohort.
